# Supplementary material
Source: publisher site journal article supplement (https://kjim.org/upload/media/kjim-2022-326-Supplementary-Table-2.pdf)
Supplement: Supplementary file 1 [file kjim-2022-326-Supplementary-Table-2.pdf]

**Supplementary Table 2. Medications at discharge in checklist and non-checklist group**

|                                                                                 | Checklist group | Non-checklist group | <i>p</i> value |
|---------------------------------------------------------------------------------|-----------------|---------------------|----------------|
| Medication in all subtypes of heart failure                                     | 244             | 171                 |                |
| RASI (ACEI, ARB, ARNI)                                                          | 134 (54.9)      | 78 (45.6)           | 0.062          |
| ACEI/ARB use                                                                    | 97 (39.8)       | 60 (35.1)           | 0.335          |
| ARNI use                                                                        | 37 (15.2)       | 18 (10.5)           | 0.170          |
| Beta-blockers use                                                               | 165 (67.6)      | 87 (50.9)           | 0.001          |
| MRA use                                                                         | 100 (41.0)      | 59 (34.5)           | 0.181          |
| Ivabradine use                                                                  | 15 (6.2)        | 6 (3.5)             | 0.224          |
| SGLT2 inhibitors                                                                | 40 (16.4)       | 25 (14.7)           | 0.642          |
| Among DM                                                                        | 26 (25.0)       | 20 (30.8)           | 0.412          |
| Medication in HFrEF patients                                                    | 131             | 75                  |                |
| RASI (ACEI, ARB, ARNI)                                                          | 87 (66.4)       | 44 (58.7)           | 0.266          |
| ACEI/ARB use                                                                    | 53 (40.5)       | 26 (34.7)           | 0.411          |
| ARNI use                                                                        | 34 (26.0)       | 18 (24.0)           | 0.756          |
| Beta-blockers use                                                               | 104 (79.4)      | 47 (62.7)           | 0.009          |
| MRA use                                                                         | 64 (48.9)       | 33 (44.0)           | 0.502          |
| Ivabradine use                                                                  | 14 (10.7)       | 6 (8.0)             | 0.531          |
| SGLT2 inhibitors                                                                | 30 (22.9)       | 13 (17.3)           | 0.344          |
| Among DM                                                                        | 20 (30.8)       | 9 (26.5)            | 0.425          |
| Anticoagulant or antiplatelet medication on HF patient with atrial fibrillation | 100             | 58                  |                |
| Anticoagulant                                                                   | 66 (66.7)       | 39 (69.6)           | 0.703          |
| NOAC                                                                            | 52 (52.5)       | 32 (57.1)           | 0.579          |
| Warfarin                                                                        | 14 (14.1)       | 7 (12.5)            | 0.774          |
| Antiplatelet                                                                    | 10 (10.1)       | 4 (7.1)             | 0.537          |
| Antiplatelet and anticoagulant                                                  | 14 (14.1)       | 9 (16.1)            | 0.745          |
| None                                                                            | 9 (9.1)         | 4 (7.1)             | 0.674          |
| Number of GDMT and adequacy score                                               |                 |                     |                |
| Number of GDMT                                                                  | 2 (1–2)         | 1 (1–2)             | < 0.001        |
| Adequacy score 1                                                                | 3 (2–5)         | 2 (1–4)             | < 0.001        |
| Adequacy score 2                                                                | 3 (1–4)         | 2 (1–4)             | 0.003          |

Values are presented as median (interquartile range) or number (%).

RASI, renin-angiotensin system inhibitors; ACEI, angiotensin-converting enzyme inhibitors; ARB, angiotensin receptor blockers; ARNI, angiotensin receptor-neprilysin inhibitor; MRA, mineralocorticoid-receptor-antagonists; SGLT2, sodium-glucose cotransporter-2; DM, diabetes mellitus; HFrEF, heart failure with reduced ejection fraction; HF, heart failure; NOAC, non-vitamin K oral anticoagulants; GDMT, guideline-directed medical therapy.
